# Supplementary material for: Premenstrual Symptoms and Work: Exploring Female Staff Experiences and Recommendations for Workplaces
Source: MDPI journal article supplement (doi:10.3390/ijerph18073647), 2021-03-31
Supplement: s1 [file s1]

**Supplementary Material**

**Table S1.** Sample responses for the individual-related variables ( $N = 125$ ).

| Variable                               | Means (SD), % (Ns)                                        |
|----------------------------------------|-----------------------------------------------------------|
| Age (years) ( $n = 119$ )              | $M = 38.79$ ( $SD = 6.35$ ) (range 24–54)                 |
| Ethnicity ( $n = 124$ )                | White (British, Irish, European, Other)                   |
|                                        | 87.9% ( $n = 111$ )                                       |
| Educational level                      | Black (Caribbean, Other) / Asian (Indian, British, Other) |
|                                        | 5.6% ( $n = 7$ ) / 4.8% ( $n = 6$ )                       |
| Sexuality                              | ≤ Higher/A-level/National Grade                           |
|                                        | 8.8% ( $n = 11$ )                                         |
| Relationship status ( $n = 124$ )      | Degree/Professional or Postgraduate                       |
|                                        | 90.4% ( $n = 113$ )                                       |
| Dependents ( $n = 124$ )               | Heterosexual                                              |
|                                        | 89.6% ( $n = 112$ )                                       |
| General health                         | Bisexual / Lesbian                                        |
|                                        | 4.0% ( $n = 5$ ) / 3.2% ( $n = 4$ )                       |
| BMI ( $n = 117$ )                      | Single/ Divorced/ Separated                               |
|                                        | 28.2% ( $n = 35$ )                                        |
| Exercise frequency                     | In a relationship /co-habiting/ married                   |
|                                        | 71.8% ( $n = 89$ )                                        |
| Alcohol consumption (units per week)   | Children                                                  |
|                                        | 57.3% ( $n = 71$ )                                        |
| Smoker status:                         | Friend/relative/other                                     |
|                                        | 11.3% ( $n = 14$ )                                        |
| Sleep quality                          | 1 (poor)                                                  |
|                                        | 10.4% ( $n = 33$ )                                        |
| Depression (GAD-7) <sup>a</sup>        | 2 (fair)                                                  |
|                                        | 18.4% ( $n = 23$ )                                        |
| Anxiety (PHQ-9) <sup>a</sup>           | 3 (good)                                                  |
|                                        | 40.0% ( $n = 50$ )                                        |
| Working hours (per week) ( $n = 120$ ) | 4 (very good)                                             |
|                                        | 26.4% ( $n = 33$ )                                        |
| Work status                            | 5 (excellent)                                             |
|                                        | 4.8% ( $n = 6$ )                                          |
| Work pattern/shift work ( $n = 123$ )  | $M = 2.97$ ( $SD = 1.03$ )                                |
|                                        | $M = 27.81$ ( $SD = 6.46$ ) (range 17.10–47.20)           |
| Flexible working ( $n = 123$ )         | 1 (rarely/never)                                          |
|                                        | 16.0% ( $n = 20$ )                                        |
| Type of work ( $n = 124$ )             | 2 (less than once per week)                               |
|                                        | 12.0% ( $n = 15$ )                                        |
| Depression (GAD-7) <sup>a</sup>        | 3 (once per week)                                         |
|                                        | 16.0% ( $n = 20$ )                                        |
| Anxiety (PHQ-9) <sup>a</sup>           | 4 (2-3 times per week)                                    |
|                                        | 36.8% ( $n = 46$ )                                        |
| Working hours (per week) ( $n = 120$ ) | 5 (4-6 times per week)                                    |
|                                        | 15.2% ( $n = 19$ )                                        |
| Work status                            | 6 (every day)                                             |
|                                        | 4.0% ( $n = 5$ )                                          |
| Work pattern/shift work ( $n = 123$ )  | $M = 3.35$ ( $SD = 1.41$ )                                |
|                                        | $M = 38.83$ ( $SD = 8.79$ ) (range 15–55)                 |
| Flexible working ( $n = 123$ )         | 1 (none)                                                  |
|                                        | 25.6% ( $n = 32$ )                                        |
| Type of work ( $n = 124$ )             | 2 (1-6 units per week)                                    |
|                                        | 51.2% ( $n = 64$ )                                        |
| Working hours (per week) ( $n = 120$ ) | 3 (7-13 units per week)                                   |
|                                        | 17.6% ( $n = 22$ )                                        |
| Work status                            | 4 (+14 units per week)                                    |
|                                        | 5.6% ( $n = 7$ )                                          |
| Work pattern/shift work ( $n = 123$ )  | $M = 2.03$ ( $SD = 0.81$ )                                |
|                                        | $M = 7.10$ ( $SD = 5.53$ ) (range 1–21)                   |
| Flexible working ( $n = 123$ )         | Never smoked                                              |
|                                        | 47.2% ( $n = 59$ )                                        |
| Type of work ( $n = 124$ )             | Ex-smoker / Smoker                                        |
|                                        | 40.0% ( $n = 50$ ) / 12.8% ( $n = 16$ )                   |
| Working hours (per week) ( $n = 120$ ) | 1 (very good),                                            |
|                                        | 5.6% ( $n = 7$ )                                          |
| Work status                            | 2 (fairly good),                                          |
|                                        | 44.0% ( $n = 55$ )                                        |
| Work pattern/shift work ( $n = 123$ )  | 3 (fairly bad),                                           |
|                                        | 38.4% ( $n = 48$ )                                        |
| Flexible working ( $n = 123$ )         | 4 (very bad)                                              |
|                                        | 12.0% ( $n = 15$ )                                        |
| Type of work ( $n = 124$ )             | $M = 2.57$ ( $SD = 0.78$ )                                |
|                                        | $M = 7.10$ ( $SD = 5.53$ ) (range 1–21)                   |
| Working hours (per week) ( $n = 120$ ) | $M = 8.20$ ( $SD = 5.85$ ) (range 1–27)                   |
|                                        | $M = 8.20$ ( $SD = 5.85$ ) (range 1–27)                   |

<sup>a</sup> Total summed score.

**Table S2.** Sample responses for the work-related variables and work outcomes ( $N = 125$ ).

| Variable                               | Response Options/Sub-Scale | Means (SD), % (Ns)                        |
|----------------------------------------|----------------------------|-------------------------------------------|
| Working hours (per week) ( $n = 120$ ) |                            | $M = 38.83$ ( $SD = 8.79$ ) (range 15–55) |
| Work status                            | Full-time                  | 77.6% ( $n = 97$ )                        |
|                                        | Part-time                  | 22.4% ( $n = 28$ )                        |
| Work pattern/shift work ( $n = 123$ )  | Regular (day)              | 87.8% ( $n = 108$ )                       |
|                                        | Regular (night)            | 0.8% ( $n = 1$ )                          |
| Flexible working ( $n = 123$ )         | Set hours (day/night)      | 4.1% ( $n = 5$ )                          |
|                                        | No set hours/pattern       | 5.7% ( $n = 7$ )                          |
| Type of work ( $n = 124$ )             | Other                      | 1.6% ( $n = 2$ )                          |
|                                        | Yes                        | 62.6% ( $n = 77$ )                        |
| Working hours (per week) ( $n = 120$ ) | No                         | 37.4% ( $n = 46$ )                        |
|                                        | Non-manual                 | 98.4% ( $n = 122$ )                       |

|                                                              |                                            |                                                   |
|--------------------------------------------------------------|--------------------------------------------|---------------------------------------------------|
|                                                              | Manual / Both                              | 0.8% ( <i>n</i> = 1)/<br>0.8% ( <i>n</i> = 1)     |
| Managerial/supervisory responsibilities<br>( <i>n</i> = 123) | Yes                                        | 14.6% ( <i>n</i> = 18)                            |
|                                                              | No                                         | 85.4% ( <i>n</i> = 105)                           |
| Sector                                                       | Public                                     | 68.8% ( <i>n</i> = 86)                            |
|                                                              | Private                                    | 31.2% ( <i>n</i> = 39)                            |
| Job satisfaction                                             | 1 (extremely dissatisfied)                 | 6.4% ( <i>n</i> = 8)                              |
|                                                              | 2 (very dissatisfied)                      | 10.4% ( <i>n</i> = 13)                            |
|                                                              | 3 (dissatisfied)                           | 27.2% ( <i>n</i> = 34)                            |
|                                                              | 4 (neither dissatisfied or satisfied)      | 11.2% ( <i>n</i> = 14)                            |
|                                                              | 5 (satisfied)                              | 31.1% ( <i>n</i> = 39)                            |
|                                                              | 6 (very satisfied)                         | 12.8% ( <i>n</i> = 16)                            |
|                                                              | 7 (extremely satisfied)                    | 0.8% ( <i>n</i> = 1)                              |
| Job stress ( <i>n</i> = 124)                                 |                                            | M = 3.92 (SD = 1.47)                              |
|                                                              | 1 (not stressful)                          | 3.2% ( <i>n</i> = 4) (Mild)                       |
|                                                              | 2                                          | 16.1% ( <i>n</i> = 20) (Mild)                     |
|                                                              | 3                                          | 50.0% ( <i>n</i> = 62)<br>(Moderate)              |
|                                                              | 4 (extremely stressful)                    | 30.6% ( <i>n</i> = 38) (Severe)                   |
| Work-life balance                                            |                                            | M = 3.08 (SD = 0.77)                              |
|                                                              |                                            | M = 2.55 (SD = 1.08)                              |
| Employee psychological resilience ( <i>n</i> = 122)          | 1 (low resilience)                         | 3.3% ( <i>n</i> = 4)                              |
|                                                              | 2                                          | 5.7% ( <i>n</i> = 7)                              |
|                                                              | 3                                          | 8.2% ( <i>n</i> = 10)                             |
|                                                              | 4                                          | 10.7% ( <i>n</i> = 13)                            |
|                                                              | 5                                          | 17.2% ( <i>n</i> = 21)                            |
|                                                              | 6                                          | 14.8% ( <i>n</i> = 18)                            |
|                                                              | 7                                          | 19.7% ( <i>n</i> = 24)                            |
|                                                              | 8                                          | 13.9% ( <i>n</i> = 17)                            |
|                                                              | 9 (high resilience)                        | 6.6% ( <i>n</i> = 8)                              |
|                                                              |                                            | M = 5.65 (SD = 2.08)                              |
| Working environment:                                         | Demands                                    | M = 3.54 (SD = 0.78)                              |
|                                                              | Control                                    | M = 3.20 (SD = 0.66)                              |
|                                                              | Support                                    | M = 3.45 (SD = 0.78)                              |
|                                                              | Relationships                              | M = 2.71 (SD = 0.48)                              |
|                                                              | Role                                       | M = 3.73 (SD = 0.69)                              |
| Work outcomes:                                               | Change                                     | M = 2.46 (SD = 0.96)                              |
|                                                              |                                            |                                                   |
| Job performance<br>( <i>n</i> = 123)                         | 1 (poor)                                   | 0% ( <i>n</i> = 0)                                |
|                                                              | 2                                          | 4.1% ( <i>n</i> = 5) (Low)                        |
|                                                              | 3                                          | 22.0% ( <i>n</i> = 27)                            |
|                                                              | 4                                          | (Medium)                                          |
|                                                              | 5 (excellent)                              | 55.3% ( <i>n</i> = 68) (High)                     |
|                                                              |                                            | 18.7% ( <i>n</i> = 23)<br>(Excellent)             |
| Presenteeism <sup>a</sup><br>( <i>n</i> = 121)               |                                            | M = 3.89 (SD = 0.75)                              |
|                                                              |                                            | M = 20.88 (SD = 5.17)<br>(range 9–30)             |
| Ever taken time off ( <i>n</i> = 123)                        | Work absence due to premenstrual symptoms: |                                                   |
|                                                              | Yes:                                       | 14.6% ( <i>n</i> = 18)                            |
|                                                              | Last 4 weeks ( <i>n</i> = 18)              | 11.1% ( <i>n</i> = 2)                             |
|                                                              | Days in last 4 weeks ( <i>n</i> = 2)       | M = 1.50 (days)                                   |
| Ever left early ( <i>n</i> = 118)                            | No                                         | 85.4% ( <i>n</i> = 105)                           |
|                                                              | Yes:                                       | 21.2% ( <i>n</i> = 25)                            |
|                                                              | Last 4 weeks ( <i>n</i> = 25)              | 24.0% ( <i>n</i> = 6)                             |
|                                                              | Days in last 4 weeks ( <i>n</i> = 6)       | M = 1.33 (days)                                   |
| Ever late ( <i>n</i> = 119)                                  | No                                         | 78.8% ( <i>n</i> = 93)                            |
|                                                              | Yes:                                       | 16.0% ( <i>n</i> = 19)                            |
|                                                              | Last 4 weeks ( <i>n</i> = 19)              | 36.8% ( <i>n</i> = 7)                             |
|                                                              | Days in last 4 weeks ( <i>n</i> = 7)       | M = 1.14 (days)                                   |
| Turnover intentions:                                         | No                                         | 84.0% ( <i>n</i> = 100)                           |
|                                                              |                                            |                                                   |
| Intention to reduce working hours                            | Yes / Sometimes                            | 36.0% ( <i>n</i> = 45)/<br>13.6% ( <i>n</i> = 17) |

|                                                   |                 |                                                   |
|---------------------------------------------------|-----------------|---------------------------------------------------|
|                                                   | No              | 50.4% ( <i>n</i> = 63)                            |
| Intention leave workforce                         | Yes / Sometimes | 15.2% ( <i>n</i> = 19)/<br>10.4% ( <i>n</i> = 13) |
| Intention to leave current employing organization | No              | 74.4% ( <i>n</i> = 93)                            |
|                                                   |                 | M = 3.11 (SD = 1.04)                              |

<sup>a</sup> Total summed score.

**Table S3.** Sample responses for the premenstrual-related variables (*N* = 125).

| Variables                                                    | Means (SD), % (Ns)                                                                |
|--------------------------------------------------------------|-----------------------------------------------------------------------------------|
| Premenstrual symptom severity:                               | No or mild symptoms 60.8% ( <i>n</i> = 76)                                        |
|                                                              | Moderate symptoms / Severe symptoms 34.4% ( <i>n</i> = 43) / 4.8% ( <i>n</i> = 6) |
| Duration of premenstrual symptoms:                           | Days ( <i>n</i> = 121) M = 4.59 (SD = 3.25) (range 1–14)                          |
|                                                              | Years ( <i>n</i> = 115) M = 15.37 (SD = 11.36) (range 1–40)                       |
| Sought professional help in last 6 months: ( <i>n</i> = 124) | Yes 21.0% ( <i>n</i> = 26)                                                        |
| Hormonal contraception use: ( <i>n</i> = 123)                | Yes 67.5% ( <i>n</i> = 83)                                                        |
|                                                              | Avoiding harm M = 2.43 (SD = 0.98)                                                |
|                                                              | Awareness-acceptance M = 3.31 (SD = 0.95)                                         |
| Premenstrual symptom coping: ( <i>n</i> = 124)               | Adjusting energy M = 2.65 (SD = 1.04)                                             |
|                                                              | Self-care M = 2.45 (SD = 1.01)                                                    |
|                                                              | Communicating M = 2.26 (SD = 0.80)                                                |
